# Supplementary material
Source: HighWire-hosted journal article supplement (http://www.cmaj.ca/highwire/filestream/59847/field_highwire_adjunct_files/1/151382-res-2-at.pdf)
Supplement: 151382-res-2-at.pdf [file 151382-res-2-at.pdf]

Appendix 2 (as supplied by the authors): ICD 10CA codes for severe neonatal morbidity.

| Diagnosis                          | ICD-10CA code |
|------------------------------------|---------------|
| Retinopathy of prematurity         | H35.1         |
| Intraventricular hemorrhage        | P52           |
| Periventricular leucomalacia       | P91.2         |
| Necrotizing enterocolitis          | P77           |
| Convulsions of newborn             | P90           |
| Bronchopulmonary dysplasia         | P27.1         |
| Sepsis                             | P36           |
| Respiratory distress syndrome      | P22.0         |
| Hypoxic ischemic encephalopathy    | P91.6         |
| Neonatal cerebral depression, coma | P91.5         |
